# Supplementary material
Source: PubMed Central journal article supplement (PMC4035479)
Supplement: NIHMS584313-supplement-Supplement1.pdf [file NIHMS584313-supplement-Supplement1.pdf]

## Supplementary Appendix

This appendix has been provided by the authors to give readers additional information about their work.

Supplement to: Kamel H, Navi BB, Sriram N, Hovsepian DA, Devereux RB, Elkind MSV. Risk of a thrombotic event after the 6-week postpartum period. *N Engl J Med* 2014;370:1307-15. DOI: [10.1056/NEJMoa1311485](https://doi.org/10.1056/NEJMoa1311485)

## Supplementary Appendix

### Table of Contents:

|                          |        |
|--------------------------|--------|
| Supplementary Methods    | Page 1 |
| Supplementary Tables     | Page 3 |
| Supplementary References | Page 7 |

## Supplementary Methods

### *Definition of Pre-Existing Thrombotic Disease*

We excluded patients with any recorded thrombotic disease prior to their first recorded labor and delivery by using the following *International Classification of Diseases, 9<sup>th</sup> Revision, Clinical Modification (ICD-9-CM)* codes in any emergency department or hospital discharge diagnosis code position: 253.2 (pituitary apoplexy), 410 (acute myocardial infarction), 415 (acute pulmonary heart disease), 430-438 (cerebrovascular disease), 443.21 (carotid artery dissection), 443.24 (vertebral artery dissection), 451 (phlebitis and thrombophlebitis), 453 (other venous embolism and thrombosis), 671 (venous complications in pregnancy and the puerperium), 673 (obstetrical pulmonary embolism), and 674.0 (cerebrovascular disorders in the puerperium). Intracranial hemorrhages were included in this definition because they may be the only documented manifestation of cerebral arterial or venous thrombosis with hemorrhagic transformation.<sup>1</sup>

### *Definitions of Outcomes*

#### *Ischemic stroke*

Ischemic stroke was defined as *ICD-9-CM* codes 433.x1, 434.x1, or 436 in any hospital discharge diagnosis code position without a primary hospital discharge diagnosis code for rehabilitation (V57) or any accompanying codes for trauma (800-804 or 850-854), intracerebral hemorrhage (431), or subarachnoid hemorrhage (430). This algorithm has been validated by detailed medical record review to have a sensitivity of 86%, a specificity of 95%, and a positive predictive value of 90% for ischemic stroke, and to capture samples that comprise 88% incident cases.<sup>2</sup>

#### *Acute myocardial infarction*

Acute myocardial infarction was defined as *ICD-9-CM* code 410.x1 in the first or second hospital discharge diagnosis code position. All hospitalizations lasting >180 days were excluded, and any hospitalization lasting <3 days was excluded unless the patient died during that hospitalization. This algorithm has been validated to have a positive predictive value of 94% when compared with detailed medical record review.<sup>3</sup>

#### *Venous thromboembolism*

Venous thromboembolism consisted of a composite of deep venous thrombosis or pulmonary embolism, defined as *ICD-9-CM* codes 415.1, 451.11, 451.19, 451.2, 451.81, 451.9, 453.1, 453.2, 453.8, or 453.9 in any emergency department or hospital discharge diagnosis code position. This definition has been validated to have a positive predictive value of 96% when compared with detailed medical record review.<sup>4</sup>

#### *Secondary composite outcome*

As a secondary outcome, we assessed a composite of our primary outcome plus a broadly inclusive list of other thrombosis diagnoses. This secondary outcome was defined by the following *ICD-9-CM* codes in any emergency department or hospital discharge diagnosis code position: 253.2 (pituitary apoplexy); 410.x1 (acute myocardial infarction); 415 (acute pulmonary heart disease); 430 (subarachnoid hemorrhage); 431 (intracerebral hemorrhage); 432 (other and unspecified intracranial hemorrhage); 433.x1, 434.x1, or 436 (ischemic stroke); 437.2 (hypertensive encephalopathy); 437.6 or 671.5 (cerebral venous thrombosis); 443.21 (carotid artery dissection); 443.24 (vertebral artery dissection); 451 (phlebitis and thrombophlebitis); 453 (other venous embolism and thrombosis); 671.4 (postpartum deep venous thrombosis); 673 (obstetrical pulmonary embolism); and 674.0 (cerebrovascular disorders in the puerperium). Intracranial hemorrhages were included in this definition because they may be the only documented manifestation of cerebral arterial or venous thrombosis with hemorrhagic transformation.<sup>1</sup>

### ***Definitions of Comorbidities***

We identified risk factors for thrombosis using the following *ICD-9-CM* codes: 289.81 (primary hypercoagulable state); 642 (eclampsia or pre-eclampsia); 305.1, 649, 989.84, or V15.82 (smoking); and 74 (cesarean delivery).

**Table S1.** Numbers and Absolute Risks of Postpartum Thrombotic Events During Sequential 3-Week Intervals After Labor and Delivery.

| <b>Time Interval After Labor and Delivery</b> | <b>Case Period<sup>a</sup></b> | <b>Crossover Period<sup>b</sup></b> | <b>Absolute Risk Difference<sup>c</sup></b> | <b>Odds Ratio<sup>d</sup></b> |
|-----------------------------------------------|--------------------------------|-------------------------------------|---------------------------------------------|-------------------------------|
| <b>0 through 3 weeks</b>                      |                                |                                     |                                             |                               |
| <b>Stroke, MI, or VTE<sup>e</sup></b>         | 329 (19.5)                     | 18 (1.1)                            | 18.4 (16.2-20.7)                            | 18.3 (11.4-29.4)              |
| Stroke                                        | 103 (6.1)                      | 9 (0.5)                             | 5.6 (4.3-6.9)                               | 11.4 (5.8-22.6)               |
| MI                                            | 13 (0.8)                       | 1 (0.1)                             | 0.7 (0.2-1.2)                               | 13.0 (1.7-99.4)               |
| VTE                                           | 213 (12.6)                     | 8 (0.5)                             | 12.2 (10.4-13.9)                            | 26.6 (13.1-53.9)              |
| Stroke, MI, VTE, or other <sup>f</sup>        | 2006 (118.8)                   | 43 (2.6)                            | 116.3 (111.0-121.6)                         | 46.7 (34.5-63.1)              |
| <b>4 through 6 weeks</b>                      |                                |                                     |                                             |                               |
| <b>Stroke, MI, or VTE</b>                     | 82 (4.9)                       | 20 (1.2)                            | 3.7 (2.4-4.9)                               | 4.1 (2.5-6.7)                 |
| Stroke                                        | 16 (0.9)                       | 5 (0.3)                             | 0.7 (0.1-1.2)                               | 3.2 (1.2-8.7)                 |
| MI                                            | 0 (0)                          | 0 (0)                               | 0 (-0.1-0.1)                                | N/A <sup>g</sup>              |
| VTE                                           | 66 (3.9)                       | 15 (0.9)                            | 3.0 (1.9-4.1)                               | 4.4 (2.5-7.7)                 |
| Stroke, MI, VTE, or other                     | 247 (14.6)                     | 56 (3.3)                            | 11.3 (9.2-13.4)                             | 4.4 (3.3-5.9)                 |
| <b>7 through 9 weeks</b>                      |                                |                                     |                                             |                               |
| <b>Stroke, MI, or VTE</b>                     | 59 (3.5)                       | 25 (1.5)                            | 2.0 (0.9-3.1)                               | 2.4 (1.5-3.8)                 |
| Stroke                                        | 9 (0.5)                        | 6 (0.4)                             | 0.2 (-0.3-0.7)                              | 1.5 (0.5-4.2)                 |
| MI                                            | 4 (0.2)                        | 2 (0.1)                             | 0.1 (-0.2-0.5)                              | 2.0 (0.4-10.9)                |
| VTE                                           | 46 (2.7)                       | 17 (1.0)                            | 1.7 (0.7-2.7)                               | 2.7 (1.6-4.7)                 |
| Stroke, MI, VTE, or other                     | 125 (7.4)                      | 49 (2.9)                            | 4.5 (2.9-6.1)                               | 2.6 (1.8-3.5)                 |
| <b>10 through 12 weeks</b>                    |                                |                                     |                                             |                               |
| <b>Stroke, MI, or VTE</b>                     | 36 (2.1)                       | 19 (1.1)                            | 1.0 (0.1-1.9)                               | 1.9 (1.1-3.3)                 |
| Stroke                                        | 6 (0.4)                        | 3 (0.2)                             | 0.2 (-0.2-0.6)                              | 2.0 (0.5-8.0)                 |
| MI                                            | 4 (0.2)                        | 0 (0)                               | 0.2 (-0.1-0.5)                              | N/A <sup>g</sup>              |
| VTE                                           | 26 (1.5)                       | 16 (0.9)                            | 0.6 (-0.2-1.4)                              | 1.6 (0.9-3.0)                 |
| Stroke, MI, VTE, or other                     | 72 (4.3)                       | 45 (2.7)                            | 1.6 (0.3-2.9)                               | 1.6 (1.1-2.3)                 |
| <b>13 through 15 weeks</b>                    |                                |                                     |                                             |                               |
| <b>Stroke, MI, or VTE</b>                     | 32 (1.9)                       | 16 (0.9)                            | 0.9 (0.1-1.8)                               | 2.0 (1.1-3.6)                 |
| Stroke                                        | 7 (0.4)                        | 3 (0.2)                             | 0.2 (-0.2-0.7)                              | 2.3 (0.6-9.0)                 |
| MI                                            | 1 (0.1)                        | 1 (0.1)                             | 0 (-0.2-0.2)                                | 1.0 (0.1-16.0)                |
| VTE                                           | 24 (1.4)                       | 12 (0.7)                            | 0.7 (-0.1-1.5)                              | 2.0 (1.0-4.0) <sup>h</sup>    |
| Stroke, MI, VTE, or other                     | 56 (3.3)                       | 40 (2.4)                            | 0.9 (-0.2-2.1)                              | 1.4 (0.9-2.1)                 |
| <b>16 through 18 weeks</b>                    |                                |                                     |                                             |                               |
| <b>Stroke, MI, or VTE</b>                     | 23 (1.4)                       | 23 (1.4)                            | 0 (-0.8-0.8)                                | 1.0 (0.6-1.8)                 |
| Stroke                                        | 2 (0.1)                        | 6 (0.4)                             | -0.2 (-0.6-0.2)                             | 0.3 (0.1-1.7)                 |
| MI                                            | 1 (0.1)                        | 1 (0.1)                             | 0 (-0.2-0.2)                                | 1.0 (0.1-16.0)                |
| VTE                                           | 20 (1.2)                       | 16 (0.9)                            | 0.2 (-0.5-1.0)                              | 1.3 (0.6-2.4)                 |
| Stroke, MI, VTE, or other                     | 43 (2.6)                       | 55 (3.3)                            | -0.7 (-1.9-0.5)                             | 0.8 (0.5-1.2)                 |
| <b>19 through 21 weeks</b>                    |                                |                                     |                                             |                               |
| <b>Stroke, MI, or VTE</b>                     | 31 (1.8)                       | 22 (1.3)                            | 0.5 (-0.4-1.4)                              | 1.4 (0.8-2.4)                 |
| Stroke                                        | 8 (0.5)                        | 6 (0.4)                             | 0.1 (-0.4-0.6)                              | 1.3 (0.5-3.8)                 |
| MI                                            | 3 (0.2)                        | 1 (0.1)                             | 0.1 (-0.2-0.4)                              | 3.0 (0.3-28.8)                |
| VTE                                           | 20 (1.2)                       | 15 (0.9)                            | 0.3 (-0.5-1.0)                              | 1.3 (0.7-2.6)                 |
| Stroke, MI, VTE, or other                     | 49 (2.9)                       | 45 (2.7)                            | 0.2 (-0.9-1.4)                              | 1.1 (0.7-1.6)                 |

| <b>22 through 24 weeks</b> |          |          |                 |                            |
|----------------------------|----------|----------|-----------------|----------------------------|
| <b>Stroke, MI, or VTE</b>  | 21 (1.2) | 31 (1.8) | -0.6 (-1.5-0.3) | 0.7 (0.4-1.2)              |
| Stroke                     | 8 (0.5)  | 9 (0.5)  | -0.1 (-0.6-0.5) | 0.9 (0.3-2.3)              |
| MI                         | 2 (0.1)  | 1 (0.1)  | 0.1 (-0.2-0.3)  | 2.0 (0.2-22.1)             |
| VTE                        | 11 (0.7) | 21 (1.2) | -0.6 (-1.3-0.1) | 0.5 (0.3-1.1)              |
| Stroke, MI, VTE, or other  | 49 (2.9) | 68 (4.0) | -1.1 (-2.4-0.2) | 0.7 (0.5-1.0) <sup>i</sup> |

Abbreviations: MI, myocardial infarction; VTE, venous thromboembolism.

<sup>a</sup>Data represent the number (frequency per 100,000) of patients with an outcome during the indicated time interval after labor and delivery.

<sup>b</sup>Data represent the number (frequency per 100,000) of patients with an outcome during the indicated time interval plus 1 year after labor and delivery.

<sup>c</sup>Data represent the difference per 100,000 deliveries (95% confidence interval) in the number of events between the case and crossover periods. Discrepancies between the reported risks for individual and composite endpoints or for different periods are due to rounding.

<sup>d</sup>Conditional logistic regression was used to calculate each patient's odds (95% confidence interval) of a thrombotic event during the case period as compared with the crossover period.

<sup>e</sup>The primary outcome was a composite of ischemic stroke, acute MI, or VTE (see preceding section of supplementary appendix for diagnosis definitions).

<sup>f</sup>The secondary outcome comprised the primary outcome plus a broader set of thrombosis diagnoses, including cerebral venous thrombosis (see preceding section of supplementary appendix for diagnosis definitions).

<sup>g</sup>Odds ratio was not estimable due to insufficient numbers of events.

<sup>h</sup>P = 0.05.

<sup>i</sup>P = 0.08.

**Table S2.** Subgroup Analyses of Thrombotic Risk During the 0-6 Week Postpartum Period.

| Characteristic                        | Case Period <sup>a</sup> | Crossover Period <sup>b</sup> | Odds Ratio <sup>c</sup> | P value for interaction |
|---------------------------------------|--------------------------|-------------------------------|-------------------------|-------------------------|
| <b>Age:</b>                           |                          |                               |                         |                         |
| >35 years                             | 115 (42.3)               | 11 (4.0)                      | 10.5 (5.6-19.4)         | 0.90                    |
| ≤35 years                             | 296 (20.9)               | 27 (1.9)                      | 11.0 (7.4-16.3)         |                         |
| <b>Eclampsia or pre-eclampsia:</b>    |                          |                               |                         |                         |
| Yes                                   | 109 (82.7)               | 6 (4.6)                       | 18.2 (8.0-41.3)         | 0.15                    |
| No                                    | 302 (19.4)               | 32 (2.1)                      | 9.4 (6.6-13.6)          |                         |
| <b>Primary hypercoagulable state:</b> |                          |                               |                         |                         |
| Yes                                   | 7 (465.7)                | 0 (0)                         | N/A <sup>d</sup>        | N/A <sup>d</sup>        |
| No                                    | 404 (24.0)               | 38 (2.3)                      | 10.6 (7.6-14.8)         |                         |
| <b>Smoking:</b>                       |                          |                               |                         |                         |
| Yes                                   | 16 (53.5)                | 1 (3.3)                       | 16.0 (2.1-120.6)        | 0.70                    |
| No                                    | 395 (23.8)               | 37 (2.2)                      | 10.7 (7.6-15.0)         |                         |
| <b>Method of delivery:</b>            |                          |                               |                         |                         |
| Cesarean                              | 246 (44.8)               | 12 (2.2)                      | 20.5 (11.5-36.6)        | 0.001                   |
| Vaginal                               | 165 (14.5)               | 26 (2.3)                      | 6.3 (4.2-9.6)           |                         |

<sup>a</sup>Data represent the number (frequency per 100,000) of patients with an outcome during the indicated time interval after labor and delivery.

<sup>b</sup>Data represent the number (frequency per 100,000) of patients with an outcome during the indicated time interval plus 1 year after labor and delivery.

<sup>c</sup>Conditional logistic regression was used to examine each patient's odds (95% confidence interval) of a thrombotic event during the 0-6 week postpartum period versus the same 6-week period 1 year later.

<sup>d</sup>Odds ratios and P values for interaction were not estimable in these subgroups due to insufficient numbers of events.

**Table S3.** Subgroup Analyses of Thrombotic Risk During the 7-12 Week Postpartum Period.

| Characteristic                        | Case Period <sup>a</sup> | Crossover Period <sup>b</sup> | Odds Ratio <sup>c</sup> | P value for interaction |
|---------------------------------------|--------------------------|-------------------------------|-------------------------|-------------------------|
| <b>Age:</b>                           |                          |                               |                         |                         |
| >35 years                             | 24 (8.8)                 | 7 (2.6)                       | 3.4 (1.5-8.0)           |                         |
| ≤35 years                             | 71 (5.0)                 | 37 (2.6)                      | 1.9 (1.3-2.9)           | 0.22                    |
| <b>Eclampsia or pre-eclampsia:</b>    |                          |                               |                         |                         |
| Yes                                   | 25 (19.0)                | 9 (6.8)                       | 2.8 (1.3-6.0)           |                         |
| No                                    | 70 (4.5)                 | 35 (2.2)                      | 2.0 (1.3-3.0)           | 0.46                    |
| <b>Primary hypercoagulable state:</b> |                          |                               |                         |                         |
| Yes                                   | 1 (66.5)                 | 0 (0)                         | N/A <sup>d</sup>        |                         |
| No                                    | 94 (5.6)                 | 44 (2.6)                      | 2.1 (1.5-3.1)           | N/A <sup>d</sup>        |
| <b>Smoking:</b>                       |                          |                               |                         |                         |
| Yes                                   | 3 (10.0)                 | 0 (0)                         | N/A <sup>d</sup>        |                         |
| No                                    | 92 (5.5)                 | 44 (2.7)                      | 2.1 (1.5-3.0)           | N/A <sup>d</sup>        |
| <b>Method of delivery:</b>            |                          |                               |                         |                         |
| Cesarean                              | 41 (7.5)                 | 19 (3.5)                      | 2.2 (1.3-3.7)           |                         |
| Vaginal                               | 54 (4.7)                 | 25 (2.2)                      | 2.2 (1.3-3.5)           | 0.99                    |

<sup>a</sup>Data represent the number (frequency per 100,000) of patients with an outcome during the indicated time interval after labor and delivery.

<sup>b</sup>Data represent the number (frequency per 100,000) of patients with an outcome during the indicated time interval plus 1 year after labor and delivery.

<sup>c</sup>Conditional logistic regression was used to examine each patient's odds (95% confidence interval) of a thrombotic event during the 7-12 week postpartum period versus the same 6-week period 1 year later.

<sup>d</sup>Odds ratios and P values for interaction were not estimable in these subgroups due to insufficient numbers of events.



## Supplementary References

1. Mullen MT, Moomaw CJ, Alwell K, et al. ICD9 codes cannot reliably identify hemorrhagic transformation of ischemic stroke. *Circ Cardiovasc Qual Outcomes* 2013;6:505-6.
2. Tirschwell DL, Longstreth WT, Jr. Validating administrative data in stroke research. *Stroke* 2002;33:2465-70.
3. Kiyota Y, Schneeweiss S, Glynn RJ, Cannuscio CC, Avorn J, Solomon DH. Accuracy of Medicare claims-based diagnosis of acute myocardial infarction: estimating positive predictive value on the basis of review of hospital records. *Am Heart J* 2004;148:99-104.
4. White RH, Gettner S, Newman JM, Trauner KB, Romano PS. Predictors of rehospitalization for symptomatic venous thromboembolism after total hip arthroplasty. *N Engl J Med* 2000;343:1758-64.
